# Supplementary material for: Daphnia as a Sentinel Species for Environmental Health Protection: A Perspective on Biomonitoring and Bioremediation of Chemical Pollution
Source: PubMed Central journal article supplement (PMC9583619; doi:10.1021/acs.est.2c01799), 2022-09-28

**Tier 1: Nontargeted profiling**

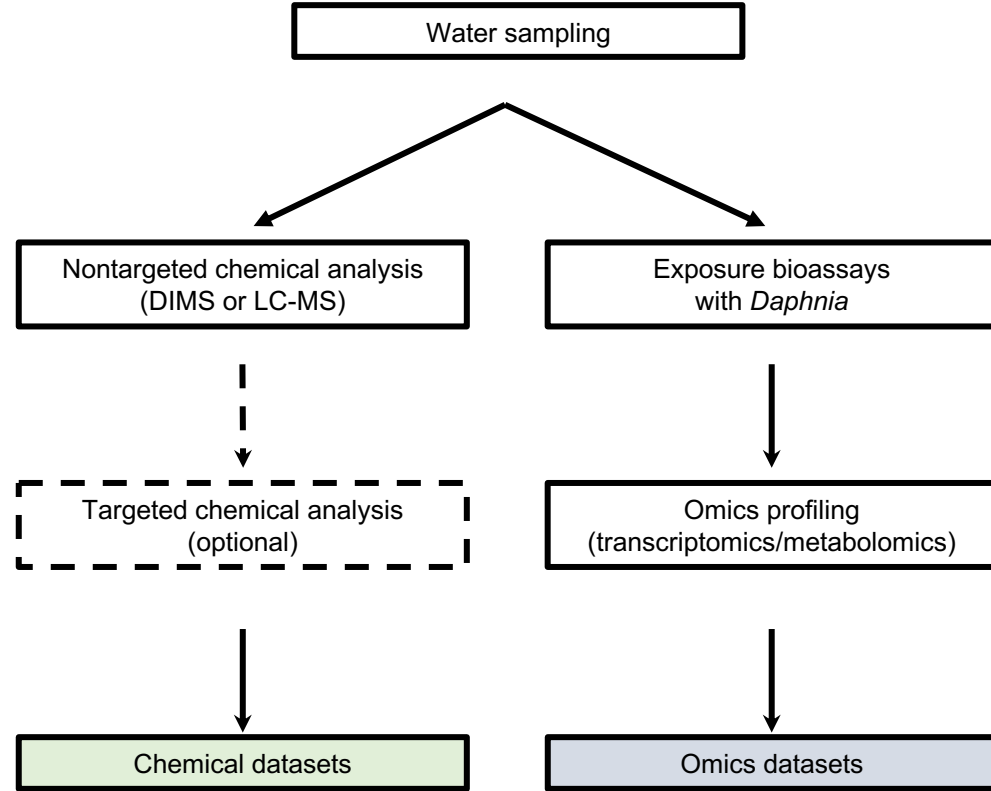

**Tier 2: Co-response modules**

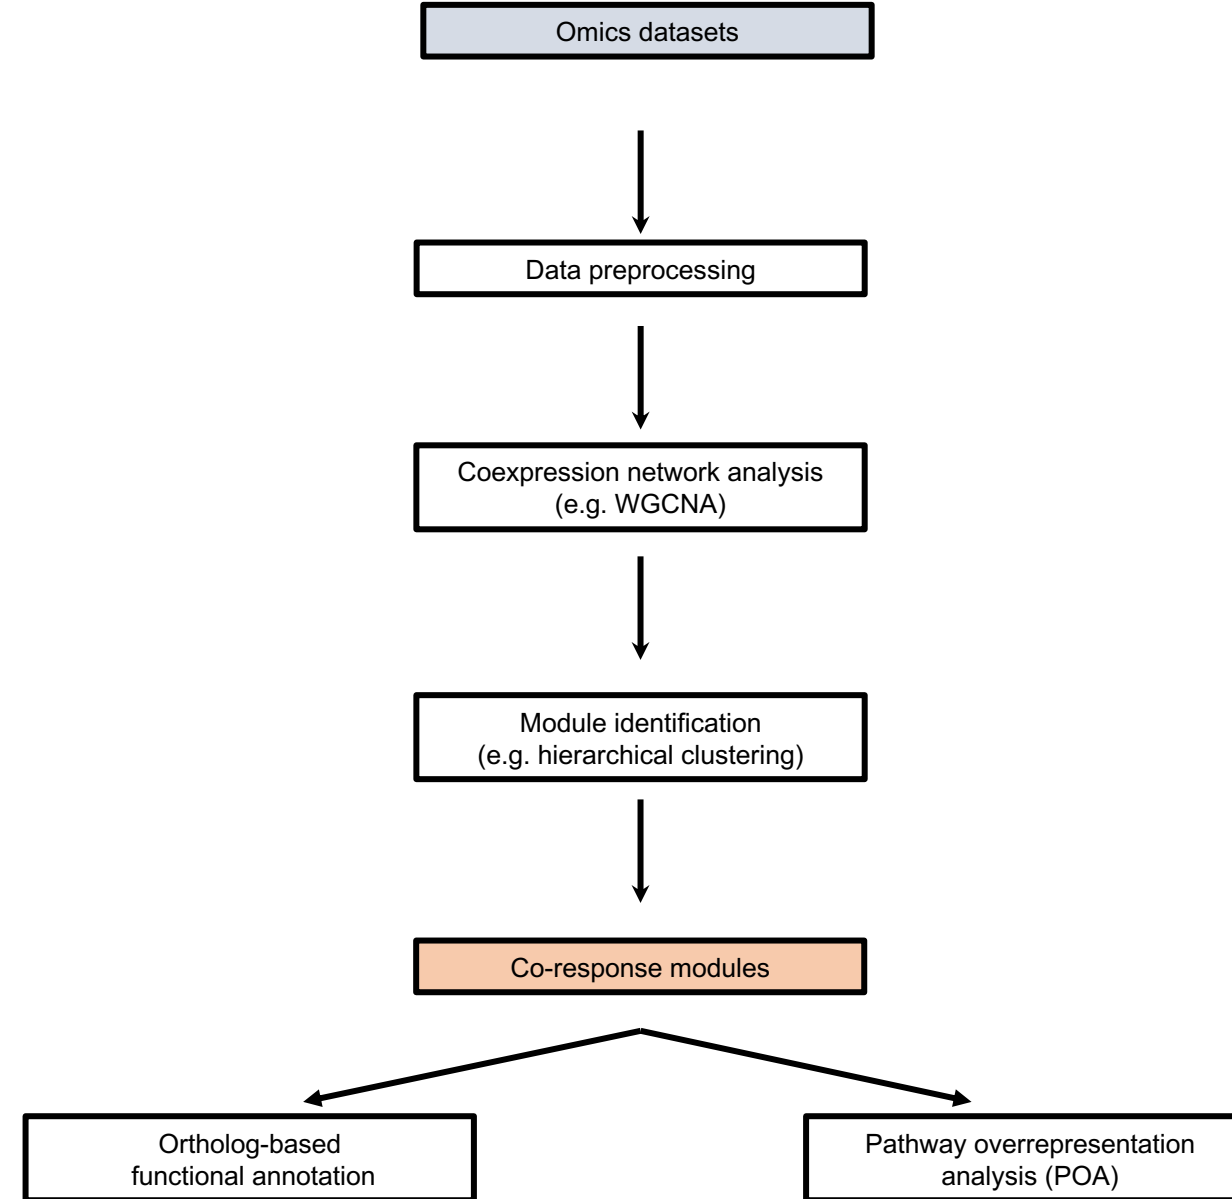

**Tier 3: Chemical-module correlations**

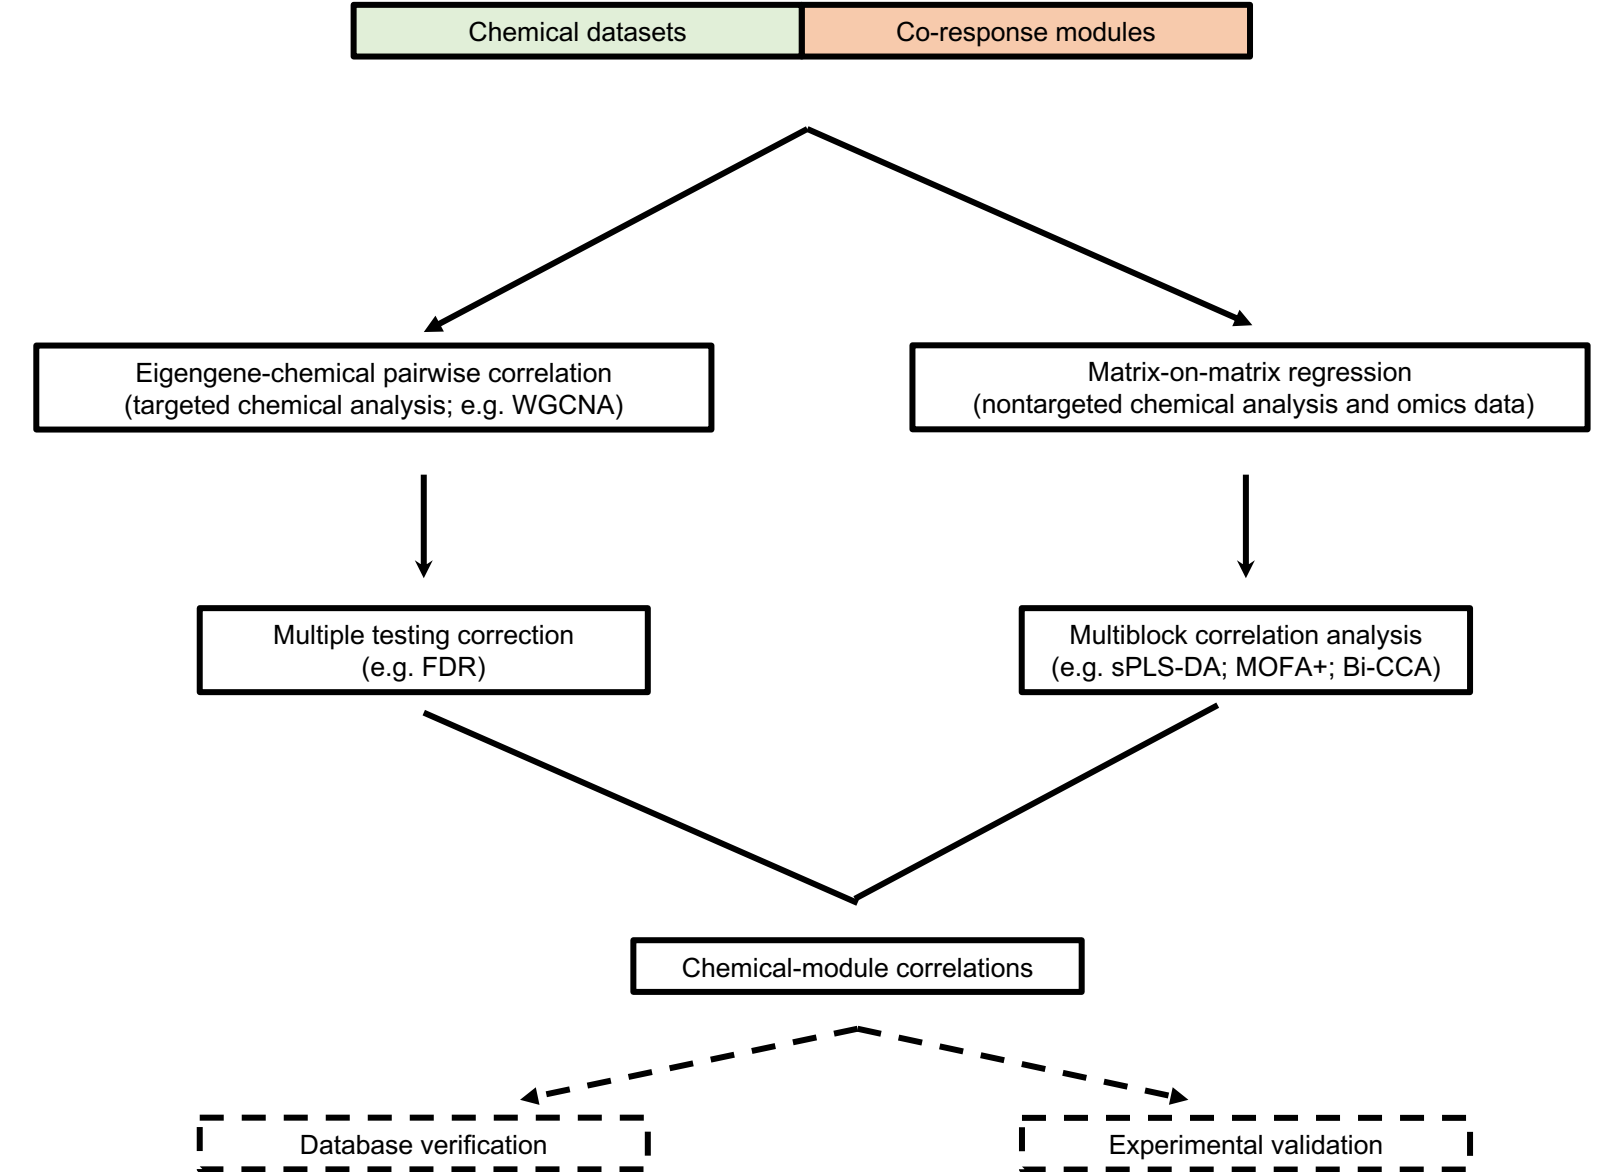

Supplement: es2c01799_si_001.pdf [file es2c01799_si_001.pdf]
